# Supplementary material for: Evaluation of the Effects of Food Safety Training on the Microbiological Load Present in Equipment, Surfaces, Utensils, and Food Manipulator’s Hands in Restaurants
Source: MDPI journal article supplement (doi:10.3390/microorganisms12040825), 2024-04-19
Supplement: s1 [file s1]

## Section S1: Checklist

| I – Physical Facilities and Environment                                                                                                                                                                                                                                                                                                                                             | P | S | N | N<br>A |
|-------------------------------------------------------------------------------------------------------------------------------------------------------------------------------------------------------------------------------------------------------------------------------------------------------------------------------------------------------------------------------------|---|---|---|--------|
| <b>Construction and Design (Layout):</b> <ul style="list-style-type: none"> <li>• Allows for sanitization ( _ )</li> <li>• Preservation ( )</li> <li>• Prevents airflow from contaminated areas to clean areas ( __ )</li> <li>• Layout flow from clean zone to dirty zone ( __ )</li> <li>• Air quality control and ventilation ( __ )</li> </ul>                                  | 5 |   |   |        |
| <b>Workspace:</b> <ul style="list-style-type: none"> <li>• Physically separated areas ( __ )</li> <li>• Adequate space for the circulation of people and supporting material ( __ )</li> <li>• Allows for hygiene operations ( __ )</li> </ul>                                                                                                                                      | 3 |   |   |        |
| <b>Facilities:</b> <ul style="list-style-type: none"> <li>• Clean ( __ )</li> <li>• Maintained ( __ )</li> <li>• Well illuminated ( __ )</li> <li>• Well ventilated ( __ )</li> <li>• Efficient exhaust system ( __ )</li> <li>• Suitable room temperature ( __ )</li> </ul>                                                                                                        | 6 |   |   |        |
| <b>Sanitary facilities:</b> <ul style="list-style-type: none"> <li>• Separated by gender ( __ )</li> <li>• Sufficient number ( __ )</li> <li>• Non-manual flush control ( _ )</li> <li>• Non-manual faucet control ( _ )</li> <li>• Faucets with hot and cold water ( _ )</li> <li>• No direct contact with production areas ( _ )</li> <li>• Adequate ventilation ( _ )</li> </ul> | 7 |   |   |        |
| <b>Changing room:</b> <ul style="list-style-type: none"> <li>• Separated by gender ( __ )</li> <li>• Equipped with showers ( __ )</li> <li>• Washbasins ( __ )</li> <li>• Clean ( __ )</li> <li>• Organized ( __ )</li> <li>• Dimensions adequate for the number of employees ( __ )</li> <li>• Individual lockers ( __ )</li> </ul>                                                | 7 |   |   |        |
| <b>Flooring:</b> <ul style="list-style-type: none"> <li>• Suitable material ( _ )</li> <li>• Clean ( )</li> <li>• Well-maintained ( )</li> <li>• Adequate drainage ( __ )</li> <li>• Non-slip ( __ )</li> </ul>                                                                                                                                                                     | 5 |   |   |        |
| <b>Walls:</b> <ul style="list-style-type: none"> <li>• Suitable material ( _ )</li> <li>• Easily washable up to 1.5 m in height ( )</li> <li>• Clean ( )</li> <li>• Well-maintained ( __ )</li> <li>• Rounded corners ( __ )</li> </ul>                                                                                                                                             | 5 |   |   |        |

|                                                                                                                                                                                                                                                                                                                                                                                                                                               |    |  |  |  |
|-----------------------------------------------------------------------------------------------------------------------------------------------------------------------------------------------------------------------------------------------------------------------------------------------------------------------------------------------------------------------------------------------------------------------------------------------|----|--|--|--|
| <b>Ceilings:</b> <ul style="list-style-type: none"> <li>• Suitable material ( _ )</li> <li>• Prevents fire propagation ( __ )</li> <li>• Clean ( )</li> <li>• Well-maintained ( )</li> <li>• Prevents particle detachment ( )</li> <li>• Lamp protection ( )</li> </ul>                                                                                                                                                                       | 6  |  |  |  |
| <b>Windows:</b> <ul style="list-style-type: none"> <li>• Suitable material ( _ )</li> <li>• Clean ( )</li> <li>• Well-maintained ( )</li> <li>• Mosquito nets ( )</li> </ul>                                                                                                                                                                                                                                                                  | 4  |  |  |  |
| <b>Doors:</b> <ul style="list-style-type: none"> <li>• Suitable material ( __ )</li> <li>• Clean ( __ )</li> <li>• Well-maintained ( __ )</li> <li>• External access doors closed or equipped with air curtains or screens ( __ )</li> </ul>                                                                                                                                                                                                  | 4  |  |  |  |
| <b>Handwashing facilities:</b> <ul style="list-style-type: none"> <li>• In main production areas ( _ )</li> <li>• Specified washing procedure ( )</li> <li>• Equipped with hot and cold water ( )</li> <li>• Liquid soap ( )</li> <li>• Disinfectant ( )</li> <li>• Adequate drying device ( __ )</li> </ul>                                                                                                                                  | 6  |  |  |  |
| <b>Water:</b> <ul style="list-style-type: none"> <li>• Drinkable at all points ( )</li> <li>• Drinkable for thermal treatment ( __ )</li> <li>• Non-potable water identified ( __ )</li> <li>• Treatment of wastewater ( __ )</li> <li>• Systems or controls to reduce water wastage ( __ )</li> </ul>                                                                                                                                        | 5  |  |  |  |
| <b>Ice:</b> <ul style="list-style-type: none"> <li>• Made from drinkable water ( __ )</li> <li>• Not contaminated during handling ( __ )</li> </ul>                                                                                                                                                                                                                                                                                           | 2  |  |  |  |
| <b>Waste or food residue:</b> <ul style="list-style-type: none"> <li>• In bins with a lid or plastic bag ( __ )</li> <li>• Non-manual activation ( __ )</li> <li>• Clean and well-maintained ( __ )</li> <li>• Proper and easily cleaned bin ( __ )</li> <li>• Adequate removal and disposal of food waste ( __ )</li> <li>• Collection area kept clean and free from animals and pests ( __ )</li> <li>• Refrigerated area ( __ )</li> </ul> | 7  |  |  |  |
| <b>Total</b>                                                                                                                                                                                                                                                                                                                                                                                                                                  | 72 |  |  |  |

| II – Food Handlers                                                                                                                                                                                                                                                                                                                    | P | S | N | N<br>A |
|---------------------------------------------------------------------------------------------------------------------------------------------------------------------------------------------------------------------------------------------------------------------------------------------------------------------------------------|---|---|---|--------|
| <b>Clothing/Footwear:</b> <ul style="list-style-type: none"> <li>Ergonomic ( __ )</li> <li>Suitable ( _ )</li> <li>Complete ( )</li> <li>Clean ( )</li> <li>Well-maintained ( )</li> <li>Exclusively for use in work areas ( __ )</li> </ul>                                                                                          | 6 |   |   |        |
| <b>Absence of:</b> <ul style="list-style-type: none"> <li>Ornaments ( _ )</li> <li>Makeup ( )</li> <li>Long nails ( __ )</li> <li>Nail polish ( __ )</li> <li>Dirty nails ( __ )</li> <li>Skin lesions ( )</li> <li>Unprotected lesions ( __ )</li> <li>Dirty nails ( __ )</li> </ul>                                                 | 7 |   |   |        |
| <b>Training:</b> <ul style="list-style-type: none"> <li>Adequate training and/or instruction for the correct performance of duties ( _ )</li> <li>Constant supervision by a person with appropriate training ( __ )</li> <li>Basic training ( __ )</li> <li>Periodic training ( __ )</li> <li>Additional training ( __ )</li> </ul>   | 5 |   |   |        |
| <b>Health and Occupational Safety:</b> <ul style="list-style-type: none"> <li>Occupational health and safety programs ( _ )</li> <li>Handlers in apparent good health ( _ )</li> <li>Existence of PPE (Personal Protective Equipment) ( __ )</li> <li>Proper use of PPE ( __ )</li> <li>PPE used whenever necessary ( __ )</li> </ul> | 5 |   |   |        |
| <b>Handwashing:</b> <ul style="list-style-type: none"> <li>Frequency ( __ )</li> <li>Necessity ( __ )</li> <li>For the right amount of time ( __ )</li> <li>With suitable product ( __ )</li> </ul>                                                                                                                                   | 4 |   |   |        |

|                                                                                                                                                                                |    |  |  |  |
|--------------------------------------------------------------------------------------------------------------------------------------------------------------------------------|----|--|--|--|
|                                                                                                                                                                                |    |  |  |  |
| <b>Hygienic habits:</b> <ul style="list-style-type: none"> <li>• Safe handling behaviour and/or procedure ( __ )</li> <li>• Correct use of disposable gloves ( __ )</li> </ul> | 2  |  |  |  |
| <b>Total</b>                                                                                                                                                                   | 29 |  |  |  |

| III – Equipment and Utensils                                                                                                                                                                                                                                                                                                                                                                                                                                                             | P  | S | N | N<br>A |
|------------------------------------------------------------------------------------------------------------------------------------------------------------------------------------------------------------------------------------------------------------------------------------------------------------------------------------------------------------------------------------------------------------------------------------------------------------------------------------------|----|---|---|--------|
| <b>Surfaces (contact with food):</b> <ul style="list-style-type: none"> <li>• Suitable material ( )</li> <li>• Well-maintained ( )</li> <li>• Sanitized ( )</li> </ul>                                                                                                                                                                                                                                                                                                                   | 3  |   |   |        |
| <b>Equipment:</b> <ul style="list-style-type: none"> <li>• Conservation ( )</li> <li>• Maintenance ( )</li> <li>• Not damaged ( __ )</li> <li>• Cleanliness ( __ )</li> <li>• Arrangement to facilitate production flow ( __ )</li> <li>• Automatic control devices ( __ )</li> <li>• Prevent contamination of food ( __ )</li> <li>• Exhaust hood where necessary ( __ )</li> <li>• Good hygiene practices ( __ )</li> <li>• Allow temperature control and monitoring ( __ )</li> </ul> | 10 |   |   |        |
| <b>Utensils and Containers:</b> <ul style="list-style-type: none"> <li>• Clean ( __ )</li> <li>• Well-maintained ( __ )</li> <li>• Suitable material ( __ )</li> <li>• Separated and identified by area ( __ )</li> </ul>                                                                                                                                                                                                                                                                | 4  |   |   |        |
| <b>Freezing Equipment:</b> <ul style="list-style-type: none"> <li>• Sanitization after raw-cooked contact ( __ )</li> <li>• Frequent sanitization during working shifts ( __ )</li> <li>• Specific to each task area ( __ )</li> </ul>                                                                                                                                                                                                                                                   | 3  |   |   |        |
| <b>Total</b>                                                                                                                                                                                                                                                                                                                                                                                                                                                                             | 20 |   |   |        |

| IV – Reception and Storage                                                                                                                                                                                                                                                                                                                                                                                                                                                                                                                                                                                                                                                                                                                                                                                                                              | P  | S | N | N<br>A |
|---------------------------------------------------------------------------------------------------------------------------------------------------------------------------------------------------------------------------------------------------------------------------------------------------------------------------------------------------------------------------------------------------------------------------------------------------------------------------------------------------------------------------------------------------------------------------------------------------------------------------------------------------------------------------------------------------------------------------------------------------------------------------------------------------------------------------------------------------------|----|---|---|--------|
| <b>Reception:</b> <ul style="list-style-type: none"> <li>• Presence of a responsible person ( )</li> <li>• At the predefined schedule ( __ )</li> <li>• Reception record ( __ )</li> <li>• Product verification ( __ )</li> <li>• Quantity ( __ )</li> <li>• Temperature ( __ )</li> <li>• Intact packaging ( __ )</li> <li>• Transport vehicle ( __ )</li> <li>• Expiry date ( __ )</li> <li>• Pre-washing when necessary ( __ )</li> <li>• Traceability ( __ )</li> </ul>                                                                                                                                                                                                                                                                                                                                                                             | 11 |   |   |        |
| <b>Storehouse:</b> <ul style="list-style-type: none"> <li>• Ventilation ( __ )</li> <li>• Absence of humidity ( __ )</li> <li>• Illumination ( __ )</li> <li>• Stacking ( __ )</li> <li>• Distance from the wall ( __ )</li> <li>• Food placed on pallets and shelves ( __ )</li> <li>• No crushed or torn packaging ( __ )</li> <li>• Labels ( __ )</li> <li>• Expiry dates ( __ )</li> <li>• FIFO or FEFO ( __ )</li> <li>• Good conservation status ( __ )</li> <li>• Cleanliness ( __ )</li> <li>• Separation and identification of non-compliant products ( __ )</li> <li>• Grouping by category ( __ )</li> <li>• Hazardous or non-edible substances labelled and separated ( __ )</li> <li>• Prevents access to pests ( __ )</li> <li>• Reduces food deterioration ( __ )</li> <li>• Absence of food in contact with the floor ( __ )</li> </ul> | 18 |   |   |        |
| <b>Cold Storage:</b> <ul style="list-style-type: none"> <li>• Separate cold equipment for each food ( )</li> <li>• Suitable temperature ( __ )</li> <li>• Control and recording of temperatures ( __ )</li> <li>• Temperature change alarm ( __ )</li> <li>• Foods within the expiration date ( __ )</li> <li>• Well-packaged foods ( __ )</li> <li>• With visible labelling ( __ )</li> <li>• Separation and identification of non-compliant products ( __ )</li> </ul>                                                                                                                                                                                                                                                                                                                                                                                | 8  |   |   |        |
| <b>Refrigeration, freezing, and frozen maintenance equipment:</b> <ul style="list-style-type: none"> <li>• Conservation ( __ )</li> <li>• Periodic maintenance ( __ )</li> <li>• Adequate cleaning ( __ )</li> <li>• Capacity suitable for the volume of food ( __ )</li> <li>• With functional temperature verification or recording devices ( __ )</li> <li>• Electronic or manual recording ( __ )</li> </ul>                                                                                                                                                                                                                                                                                                                                                                                                                                        | 8  |   |   |        |

|                                                                                                                                                                                                                                                                                                                                                                                                                                                                                         |    |  |  |  |
|-----------------------------------------------------------------------------------------------------------------------------------------------------------------------------------------------------------------------------------------------------------------------------------------------------------------------------------------------------------------------------------------------------------------------------------------------------------------------------------------|----|--|--|--|
| <ul style="list-style-type: none"> <li>• Internal opening system ( __ )</li> <li>• Adequate lighting ( __ )</li> </ul>                                                                                                                                                                                                                                                                                                                                                                  |    |  |  |  |
| <b>Defrosting:</b> <ul style="list-style-type: none"> <li>• Done correctly ( __ )</li> <li>• Defrosting liquids drained ( __ )</li> <li>• Vegetables go directly for cooking ( __ )</li> <li>• Defrosting done before cooking whenever necessary ( __ )</li> <li>• Unused frozen items kept at -18°C ( __ )</li> <li>• Defrosted items not refrozen ( __ )</li> <li>• Food packaging with weight &lt;2.5kg ( __ )</li> <li>• Defrosted items kept under refrigeration ( __ )</li> </ul> | 8  |  |  |  |
| <b>Total</b>                                                                                                                                                                                                                                                                                                                                                                                                                                                                            | 53 |  |  |  |

| V – Preparation, Cooking, and Pantry                                                                                                                                                                                                                                                                                                                                                                                                                                                                                          | P | S | N | N<br>A |
|-------------------------------------------------------------------------------------------------------------------------------------------------------------------------------------------------------------------------------------------------------------------------------------------------------------------------------------------------------------------------------------------------------------------------------------------------------------------------------------------------------------------------------|---|---|---|--------|
| <b>Raw Foods:</b> <ul style="list-style-type: none"> <li>Well separated from cooked or pre-cooked foods ( _ )</li> <li>Handled by different individuals ( _ )</li> <li>Raw vegetables and fruits are sanitized ( _ )</li> <li>Temperature monitored if necessary ( _ )</li> </ul>                                                                                                                                                                                                                                             | 4 |   |   |        |
| <b>Frying:</b> <ul style="list-style-type: none"> <li>Fryer with functioning thermostat ( _ )</li> <li>Temperature <math>\leq 180^{\circ}\text{C}</math> ( _ )</li> <li>Oil filtered before use ( _ )</li> <li>Continuous checking of sensory characteristics ( _ )</li> <li>Sampling for checking polar compounds ( _ ) <ul style="list-style-type: none"> <li>Total oil change if there is oil alteration ( _ )</li> </ul> </li> </ul>                                                                                      | 6 |   |   |        |
| <b>Cooking:</b> <ul style="list-style-type: none"> <li>Ensure safe temperatures (<math>\geq 75^{\circ}\text{C}</math>) at the core ( _ )</li> <li>Use of Pasteurized eggs in preparations that require it ( _ )</li> <li>Safe procedures for undercooked meats and eggs ( _ )</li> </ul>                                                                                                                                                                                                                                      | 3 |   |   |        |
| <b>Post-cooking:</b> <ul style="list-style-type: none"> <li>Short interval until consumption ( _ )</li> <li>Unserviced foods are immediately refrigerated ( _ )</li> <li>Proper maintenance of food temperature ( _ )</li> <li>Temperature control ( _ )</li> </ul>                                                                                                                                                                                                                                                           | 4 |   |   |        |
| <b>Dining area:</b> <ul style="list-style-type: none"> <li>Equipment, furniture, and floors sanitized ( _ )</li> <li>Replacement in clean containers ( _ )</li> <li>Containers with lids ( _ )</li> <li>Cold environments at <math>T &gt; 0^{\circ}\text{C}</math> and <math>\leq 5^{\circ}\text{C}</math> ( _ )</li> <li>Hot foods maintained at <math>T \geq 65^{\circ}\text{C}</math> ( _ )</li> <li>Temperature controls ( _ )</li> </ul>                                                                                 | 6 |   |   |        |
| <b>Dining area:</b> <ul style="list-style-type: none"> <li>Equipment, furniture, and floors sanitized ( _ )</li> <li>Replacement in clean containers ( _ )</li> <li>Containers with lids ( _ )</li> <li>Cold environments at <math>T &gt; 0^{\circ}\text{C}</math> and <math>\leq 5^{\circ}\text{C}</math> ( _ )</li> <li>Hot foods maintained at <math>T \geq 65^{\circ}\text{C}</math> ( _ )</li> <li>Temperature controls ( _ )</li> </ul>                                                                                 | 7 |   |   |        |
| <b>Transported foods:</b> <ul style="list-style-type: none"> <li>Closed carts ( _ )</li> <li>Temperature <math>&gt; 60^{\circ}\text{C}</math> for hot foods ( _ )</li> <li>Protected in closed containers ( _ )</li> <li>Temperature of <math>4^{\circ}\text{C}</math> or maximum of <math>7^{\circ}\text{C}</math> during transport for cold foods ( _ )</li> <li>Frozen foods with temperature <math>&lt; -18^{\circ}\text{C}</math> with tolerance up to <math>12^{\circ}\text{C}</math> during transport ( _ )</li> </ul> | 5 |   |   |        |
| <b>Regeneration or heating:</b> <ul style="list-style-type: none"> <li>Reaches minimum temperature of <math>75^{\circ}\text{C}</math> at the core ( _ )</li> <li>Use of suitable equipment for this purpose ( _ )</li> <li>Distributed in a short time interval ( _ )</li> </ul>                                                                                                                                                                                                                                              | 3 |   |   |        |
| <b>Cleaning and Storage Area:</b> <ul style="list-style-type: none"> <li>Suitable facilities ( _ )</li> <li>Sanitized ( _ )</li> <li>Proper storage of utensils and equipment ( _ )</li> </ul>                                                                                                                                                                                                                                                                                                                                | 7 |   |   |        |

|                                                                                                                                                                                                                                                                                                                                                                                                                                                                     |           |  |  |  |
|---------------------------------------------------------------------------------------------------------------------------------------------------------------------------------------------------------------------------------------------------------------------------------------------------------------------------------------------------------------------------------------------------------------------------------------------------------------------|-----------|--|--|--|
| <ul style="list-style-type: none"> <li>Corrosion-resistant material ( __ )</li> <li>Easy to clean ( __ )</li> <li>Equipped with hot and cold water ( __ )</li> <li>With cleaning equipment and washing machines ( __ )</li> </ul>                                                                                                                                                                                                                                   |           |  |  |  |
| <b>Washing of delicate dishes:</b> <ul style="list-style-type: none"> <li>Clean area ( )</li> <li>Well-maintained ( )</li> <li>Suitable setup ( )</li> <li>Efficient ( )</li> <li>Suitable cleaning products ( _ )</li> <li>Proper use of products ( __ )</li> <li>Hot water under pressure ( __ )</li> <li>Proper pre-washing ( __ )</li> <li>Mechanical washing ( _ )</li> <li>Proper drainage or drying ( _ )</li> <li>Proper storage of dishes ( _ )</li> </ul> | 11        |  |  |  |
| <b>Washing of heavy-duty dishes:</b> <ul style="list-style-type: none"> <li>Clean area ( )</li> <li>Well-maintained ( )</li> <li>Suitable setup ( )</li> <li>Efficient ( )</li> <li>Suitable cleaning products ( _ )</li> <li>Proper use of products ( __ )</li> <li>Mechanical washing ( _ )</li> <li>Proper drainage or drying ( _ )</li> <li>Proper storage of dishes ( _ )</li> <li>Presence of 2 sinks in case of manual washing ( __ )</li> </ul>             | 10        |  |  |  |
| <b>Sanitization:</b> <ul style="list-style-type: none"> <li>Suitable products ( __ )</li> <li>Proper procedures ( __ )</li> <li>Signage ( __ )</li> <li>Avoiding contact of chemicals with food ( __ )</li> </ul>                                                                                                                                                                                                                                                   | 4         |  |  |  |
| <b>Total</b>                                                                                                                                                                                                                                                                                                                                                                                                                                                        | <b>69</b> |  |  |  |

| VI – Quality Control                                                                                                                                                                                                                                                                                                                                                                                                                                                           | P  | S | N | N<br>A |
|--------------------------------------------------------------------------------------------------------------------------------------------------------------------------------------------------------------------------------------------------------------------------------------------------------------------------------------------------------------------------------------------------------------------------------------------------------------------------------|----|---|---|--------|
| <b>Implementation of procedures and systems:</b> <ul style="list-style-type: none"> <li>Compliance with hygiene requirements ( __ )</li> <li>Code of good practices ( __ )</li> <li>Code of procedures ( __ )</li> <li>Prerequisites of HACCP ( __ )</li> <li>Supplier prerequisites and qualification ( __ )</li> <li>Specifications document ( __ )</li> <li>Control of non-conforming products ( __ )</li> <li>Well-displayed various signage ( __ )</li> </ul>             | 8  |   |   |        |
| <b>Traceability:</b> <ul style="list-style-type: none"> <li>Identification and qualification of suppliers ( __ )</li> <li>Control of food waste ( __ )</li> </ul>                                                                                                                                                                                                                                                                                                              | 2  |   |   |        |
| <b>Documents and records:</b> <ul style="list-style-type: none"> <li>Occupational health and safety program ( __ )</li> <li>Occupational health visits ( __ )</li> <li>Training program ( __ )</li> <li>Pest control program ( __ )</li> <li>Temperatures ( __ )</li> <li>Traceability ( __ )</li> <li>Non-conformities ( __ )</li> <li>Code of good practices ( __ )</li> <li>Manufacturing code ( __ )</li> <li>Technical data sheets of cleaning products ( __ )</li> </ul> | 10 |   |   |        |
| <b>Sanitation plan:</b> <ul style="list-style-type: none"> <li>Procedures for washing and disinfection ( __ )</li> <li>Definition of areas to be cleaned ( __ )</li> <li>Equipment ( __ )</li> <li>Suitable materials and procedures ( __ )</li> <li>Responsible parties for the processes and areas ( __ )</li> </ul>                                                                                                                                                         | 5  |   |   |        |
| <b>Pest control programs:</b> <ul style="list-style-type: none"> <li>Record ( __ )</li> <li>Map ( __ )</li> <li>Specific company ( __ )</li> <li>Regular rodent and insect control ( __ )</li> <li>Absence of pest traces ( __ )</li> <li>Insect traps ( __ )</li> <li>Window mosquito nets ( __ )</li> </ul>                                                                                                                                                                  | 7  |   |   |        |
| <b>Visitors:</b> <ul style="list-style-type: none"> <li>All receive appropriate clothing ( __ )</li> <li>They comply with kitchen rules ( __ )</li> </ul>                                                                                                                                                                                                                                                                                                                      | 2  |   |   |        |
| <b>Identification of food:</b> <ul style="list-style-type: none"> <li>Labels ( __ )</li> </ul>                                                                                                                                                                                                                                                                                                                                                                                 | 8  |   |   |        |

|                                                                                                                                                                                                                                                                                                                                                                                                                                              |    |  |  |  |
|----------------------------------------------------------------------------------------------------------------------------------------------------------------------------------------------------------------------------------------------------------------------------------------------------------------------------------------------------------------------------------------------------------------------------------------------|----|--|--|--|
| <ul style="list-style-type: none"> <li>• Production date ( __ )</li> <li>• Type of food ( __ )</li> <li>• Establishment name ( __ )</li> <li>• Lot number ( __ )</li> <li>• Weight ( __ )</li> <li>• Expiry date ( __ )</li> <li>• Expiry date after handling ( __ )</li> </ul>                                                                                                                                                              |    |  |  |  |
| <b>Records and microbiological analysis:</b> <ul style="list-style-type: none"> <li>• Critical control points ( __ )</li> <li>• Foods ( __ )</li> <li>• Surfaces ( __ )</li> <li>• Handlers ( __ )</li> <li>• Equipment ( __ )</li> <li>• Utensils ( __ )</li> </ul>                                                                                                                                                                         | 6  |  |  |  |
| <b>Sample:</b> <ul style="list-style-type: none"> <li>• Collected daily ( __ )</li> <li>• All dishes ( __ )</li> <li>• Stored under refrigeration or freezing ( __ )</li> <li>• Kept for a minimum of 3 days after consumption of the entire batch ( __ )</li> <li>• Minimum quantity of 100g ( __ )</li> <li>• Sterile container ( __ )</li> <li>• Correct collection procedure ( __ )</li> <li>• Correct collection time ( __ )</li> </ul> | 8  |  |  |  |
| <b>Total</b>                                                                                                                                                                                                                                                                                                                                                                                                                                 | 57 |  |  |  |

## Section S2: Food Safety Questionnaire

Name: \_\_\_\_\_ Age: \_\_\_\_\_ Role: \_\_\_\_\_

### True or False:

- 1- The temperature danger zone for the growth of microorganisms is between 5 to 65°C. \_\_\_\_
- 2- Salmonella can only be present in eggs. \_\_\_\_
- 3- Hand hygiene is one way to prevent food poisoning. \_\_\_\_
- 4- Freezing food eliminates pathogenic microorganisms. \_\_\_\_
- 5- Cooked foods cannot be responsible for food poisoning. \_\_\_\_
- 6- The cooking temperature is sufficient to eliminate all toxins present in the food. \_\_\_\_
- 7- Bags of carrots and potatoes can be placed directly on the floor. \_\_\_\_
- 8- Raw fish/meat can be left for more than 30 minutes at room temperature on the countertop?  
\_\_\_\_
- 9- Cooked foods should be kept hot at temperatures above 65°C. \_\_\_\_

- 10- Burns and wounds can only be covered with bandages. \_\_\_\_
- 11- Cooked foods should be kept hot at temperatures above 65°C. \_\_\_\_
- 12- Waste bins can be left open during service to facilitate waste disposal. \_\_\_\_
- 13- Is it possible to tell if a surface or food is contaminated just by observation? \_\_\_\_
- 14- Cooked food and raw food should be handled with different utensils and stored in different places. \_\_\_\_
- 15- The use of color-coded cutting boards is to differentiate the foods that can be cut on them and prevent cross-contamination? \_\_\_\_
- 16- All food handlers must maintain a high level of hygiene. \_\_\_\_
- 17- Should cutting boards be sanded when there are already many cuts or perforations in them? \_\_\_\_
- 18- Can chemicals be stored next to raw materials? \_\_\_\_
- 19- Can work uniforms only be worn at the workplace? \_\_\_\_

**Multiple Choice:**

1. Of the microorganisms listed below, which ones have you heard of or know of their existence?

|                               |  |
|-------------------------------|--|
| <i>Salmonella</i>             |  |
| <i>Clostridium Botulinum</i>  |  |
| <i>E. coli</i>                |  |
| <i>Yersinia</i>               |  |
| <i>Campylobacter jejuni</i>   |  |
| <i>Listeria monocytogenes</i> |  |
| <i>Bacillus cereus</i>        |  |
| <i>Staphylococcus aureus</i>  |  |

2. Food poisoning can cause various symptoms. Select the best option:

- a) Vomiting and diarrhoea
- b) Fever

- c) Nausea and abdominal pain
- d) Muscle aches
- e) All of the above

3. The onset of symptoms due to food poisoning takes \_\_\_\_ to appear:

- a) Minutes
- b) Hours
- c) Days
- d) All of the above

**Section S3: Qualitative classification in Non-Compliant and Acceptable for *Enterobacteriaceae* and Total Mesophilic Bacteria results.**

*Enterobacteriaceae*

| Place of sampling |     | Restaurant<br>A | Restaurant<br>B | Restaurant<br>C | Restaurant<br>D |
|-------------------|-----|-----------------|-----------------|-----------------|-----------------|
| N=208             |     | n               | n               | n               | n               |
| Equipment         | NC  | 0               | 0               | 1               | 0               |
|                   | Acc | 12              | 12              | 19              | 12              |
| Surfaces          | NC  | 8               | 7               | 7               | 2               |
|                   | Acc | 16              | 17              | 14              | 22              |
| Utensils          | NC  | 3               | 3               | 4               | 3               |
|                   | Acc | 13              | 13              | 8               | 13              |
| Total             |     | 52              | 52              | 52              | 52              |

Non-compliant (NC) > 1 CFU/cm<sup>2</sup>; acceptable (Acc) ≤ 1 CFU/cm<sup>2</sup>.

**TMB (Total Mesophilic Bacteria)**

| Place of sampling |     | Restaurant<br>A | Restaurant<br>B | Restaurant<br>C | Restaurant<br>D |
|-------------------|-----|-----------------|-----------------|-----------------|-----------------|
| N=208             |     | n               | n               | n               | n               |
| Equipment         | NC  | 0               | 3               | 4               | 0               |
|                   | Acc | 12              | 9               | 16              | 12              |
| Surfaces          | NC  | 11              | 9               | 8               | 3               |
|                   | Acc | 13              | 15              | 12              | 19              |
| Utensils          | NC  | 4               | 2               | 5               | 4               |
|                   | Acc | 12              | 14              | 7               | 12              |
| Total             |     | 52              | 52              | 52              | 52              |

Non-compliant (NC)  $\geq 100$  CFU/cm<sup>2</sup>; acceptable (Acc)  $< 100$  CFU/cm<sup>2</sup>.
